# Supplementary material for: The Role of Methionine Aminopeptidase 2 in Lymphangiogenesis
Source: MDPI journal article supplement (doi:10.3390/ijms21145148), 2020-07-21
Supplement: s1 [file s1]

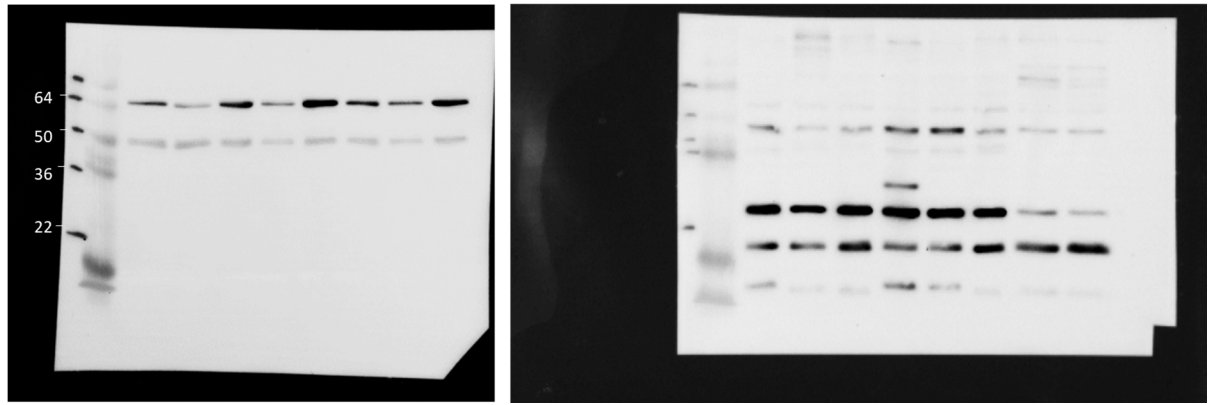

**Figure S1:** Basal MetAp2 expression in LECs compared with VECs. Western blot analyses for determining the expression of MetAp2 in HUVECs (VECs) and HMVEC-dLyAd (LECs) cells. qRT-PCR was used to quantify the MetAp2 mRNA levels in both cell lines revealing that the lymphatic cells expressed about 60% of the corresponding mRNA levels in VECs

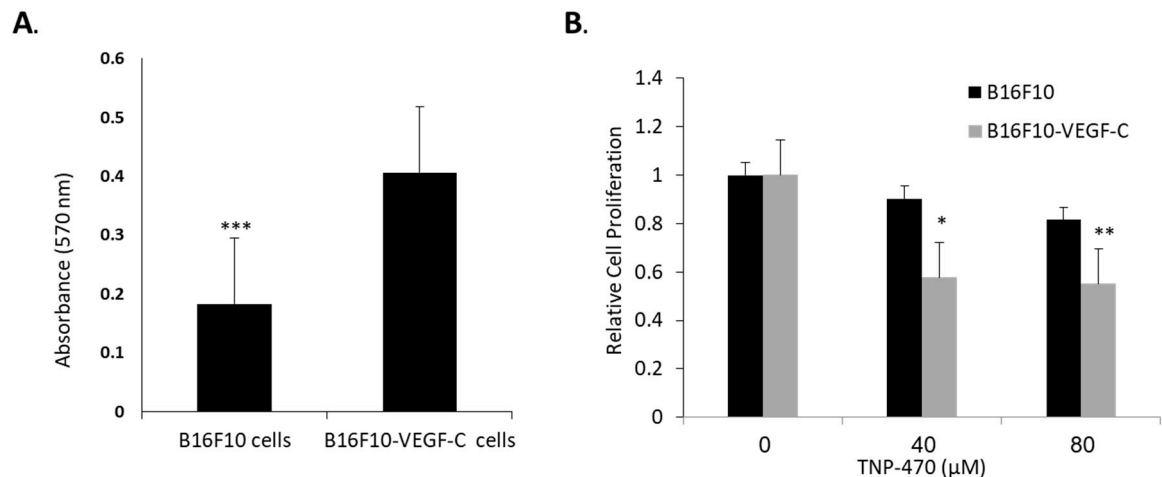

**Figure S2:** Relative cell division rate of B16F10 and B16F10-VEGF-C cells. (A) B16F10 and B16F10-VEGF-C cell proliferation was investigated after 72 h of incubation using an MTT assay. B16F10-VEGF-C cells show ~50% increase in cell proliferation compared with B16F10 cells.  $n=7$ . \*\*\* $p<0.005$ . (B) Cells were treated with 0, 40 and 80  $\mu\text{M}$  of TNP-470 for 72 h after which an MTT assay was conducted to quantify their relative proliferation. B16F10-VEGF-C cell proliferation is significantly reduced with 40 and 80  $\mu\text{M}$  treatment of TNP-470 compared with B16F10 cells (~25-30% reduction).  $n=6-7$ . \* $P<0.05$ , \*\* $P<0.01$ . Results are presented as mean  $\pm$  SEM.
